# Supplementary material for: Residential exposure to transportation noise in Denmark and incidence of dementia: national cohort study
Source: PubMed Central journal article supplement — BMJ. 2021 Sep 9;374:n1954. doi: 10.1136/bmj.n1954 (PMC8424489; doi:10.1136/bmj.n1954), 2021-09-09
Supplement: canm066236.ww1.pdf [file canm066236.ww1.pdf]

## Supplementary Information

**Supplementary table 1.** International Classification of Diseases (ICD)-8 and ICD-10 codes used to identify dementia diagnosis.

| <b>Dementia type</b>                   | <b>ICD-8</b>                                   | <b>ICD-10</b>                                         |
|----------------------------------------|------------------------------------------------|-------------------------------------------------------|
| Alzheimer's disease                    | 290.10                                         | F00.0, F00.1, F00.2 F00.9, G30.0, G30.1, G30.8, G30.9 |
| Vascular dementia                      | 293.09, 293.19                                 | F01.0, F01.1, F01.2, F01.3, F01.8, F01.9              |
| Parkinson's disease dementia           |                                                | F02.3, G31.8E                                         |
| Unspecified or other types of dementia | 290.09, 290.11, 290.18, 290.19, 094.19, 292.09 | F03.9, F02.8 F02.0, G31.0B                            |

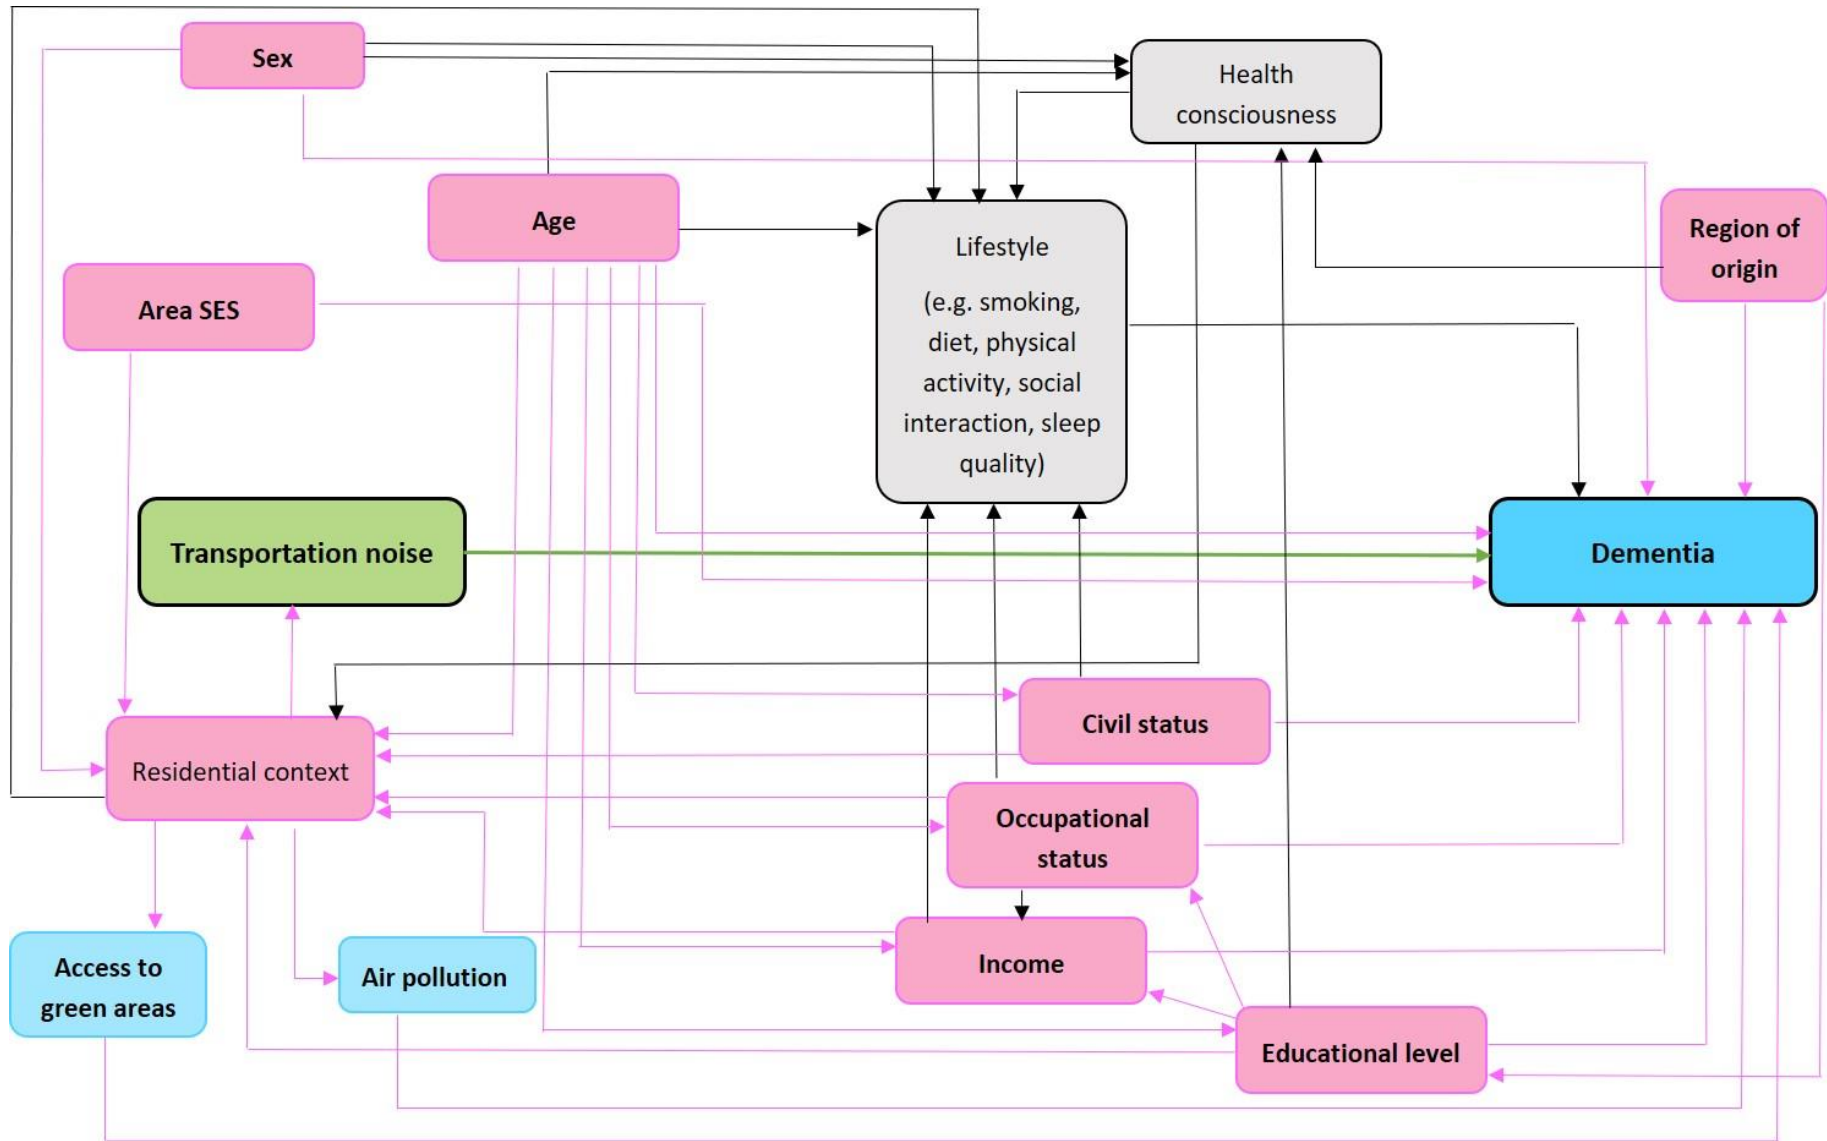

**Supplementary figure 1.** Directed Acyclic Graph displaying the relationship between transportation noise, dementia, and other variables. The variables in bold were used as covariates in our models.

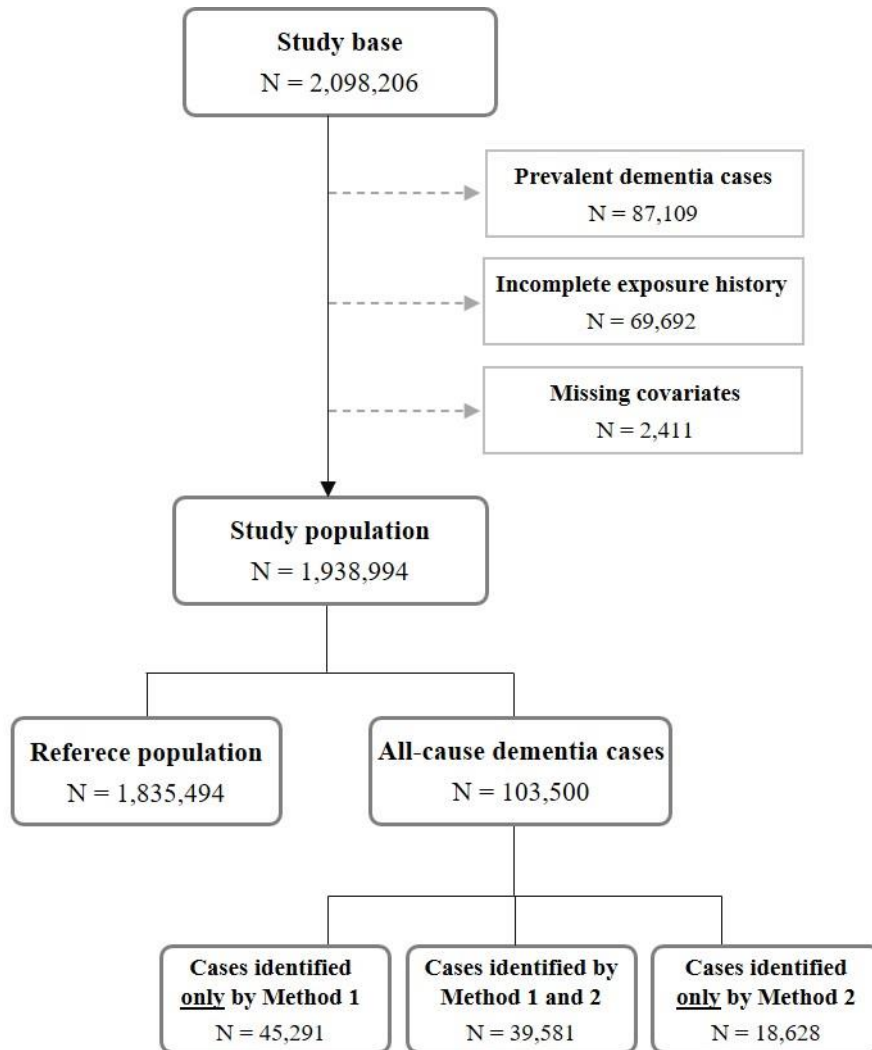

**Supplementary figure 2.** Flowchart of the study population and dementia cases. Method 1 refers to primary or secondary dementia diagnoses recorded at the hospital registries and Method 2 refers to at least one prescription of an anti-dementia drug.

**Supplementary table 2.** Baseline characteristics of dementia cases and non-cases.

| <b>Baseline characteristics</b>                                                  | <b>Cases<br/>N = 103,500</b> | <b>Non-cases<br/>N = 1,835,494</b> |
|----------------------------------------------------------------------------------|------------------------------|------------------------------------|
| <b>Individual level</b>                                                          |                              |                                    |
| Sex (% , men)                                                                    | 39.4                         | 47.3                               |
| Age (mean $\pm$ standard deviation)                                              | 74.6 $\pm$ 8.2               | 65.7 $\pm$ 8.3                     |
| Country of origin (%)                                                            |                              |                                    |
| Denmark                                                                          | 99.5                         | 98.7                               |
| Other Western country                                                            | 0.3                          | 0.6                                |
| Non-Western country                                                              | 0.2                          | 0.7                                |
| Civil status (%)                                                                 |                              |                                    |
| Married or cohabiting                                                            | 55.2                         | 69.9                               |
| Widow(er)                                                                        | 30.9                         | 13.4                               |
| Divorced                                                                         | 8.7                          | 10.0                               |
| Single                                                                           | 5.2                          | 6.7                                |
| Individual income (%) <sup>b</sup>                                               |                              |                                    |
| Q1                                                                               | 45.1                         | 28.3                               |
| Q2                                                                               | 27.5                         | 23.9                               |
| Q3                                                                               | 10.9                         | 15.8                               |
| Q4                                                                               | 7.7                          | 14.9                               |
| Q5                                                                               | 8.8                          | 17.1                               |
| Occupational status (%)                                                          |                              |                                    |
| Blue collar                                                                      | 1.3                          | 8.7                                |
| White collar                                                                     | 7.1                          | 36.8                               |
| Unemployed                                                                       | 1.0                          | 4.3                                |
| Retired                                                                          | 90.6                         | 50.2                               |
| Highest attained education (%)                                                   |                              |                                    |
| Mandatory education                                                              | 45.5                         | 36.6                               |
| Secondary or vocational education                                                | 27.5                         | 39.2                               |
| Medium or long education                                                         | 9.8                          | 17.2                               |
| Unknown                                                                          | 17.2                         | 7.0                                |
| <b>Address-level <sup>b</sup></b>                                                |                              |                                    |
| Proportion of high-quality green space (%)                                       |                              |                                    |
| $\geq 15$ % in 150 m radius                                                      | 20.6                         | 21.1                               |
| $\geq 20$ % in 1000 m radius                                                     | 24.6                         | 25.8                               |
| Urbanity (%)                                                                     |                              |                                    |
| Low ( $\leq 100$ inhabitants/km <sup>2</sup> )                                   | 20.8                         | 26.1                               |
| Medium (101-4999 inhabitants/km <sup>2</sup> )                                   | 70.1                         | 67.7                               |
| High ( $\geq 5000$ inhabitants/km <sup>2</sup> )                                 | 9.1                          | 6.2                                |
| Building type (%)                                                                |                              |                                    |
| Single family house                                                              | 45.0                         | 59.2                               |
| Semi-detached house                                                              | 18.0                         | 15.5                               |
| Multi-story building                                                             | 36.8                         | 25.0                               |
| Other                                                                            | 0.2                          | 0.3                                |
| 10-year mean air pollution exposure (mean $\pm$ standard deviation) <sup>c</sup> |                              |                                    |
| PM <sub>2.5</sub> ( $\mu\text{g}/\text{m}^3$ )                                   | 16.7 $\pm$ 1.4               | 15.5 $\pm$ 1.9                     |
| NO <sub>2</sub> ( $\mu\text{g}/\text{m}^3$ )                                     | 21.6 $\pm$ 8.3               | 18.8 $\pm$ 7.5                     |
| Area-level factors (mean $\pm$ standard deviation)                               |                              |                                    |
| % of population with low income (1 <sup>st</sup> quartile)                       | 4.9 $\pm$ 2.3                | 4.7 $\pm$ 2.2                      |
| % unemployed in population                                                       | 2.0 $\pm$ 0.7                | 1.7 $\pm$ 0.7                      |
| % of population in manual labor                                                  | 12.4 $\pm$ 3.1               | 12.6 $\pm$ 3.2                     |
| % of population with only basic education                                        | 11.1 $\pm$ 3.3               | 10.4 $\pm$ 3.4                     |
| % population with criminal record                                                | 0.5 $\pm$ 0.3                | 0.5 $\pm$ 0.3                      |
| % single-parent families                                                         | 5.6 $\pm$ 1.7                | 5.6 $\pm$ 1.8                      |

<sup>a</sup> Personal income quintiles were standardized by calendar year and sex.

<sup>b</sup> Address-level characteristics were calculated based on the addresses where each of the participants lived at baseline.

<sup>c</sup> PM<sub>2.5</sub>: fine particulate matter; NO<sub>2</sub>: nitrogen dioxide.

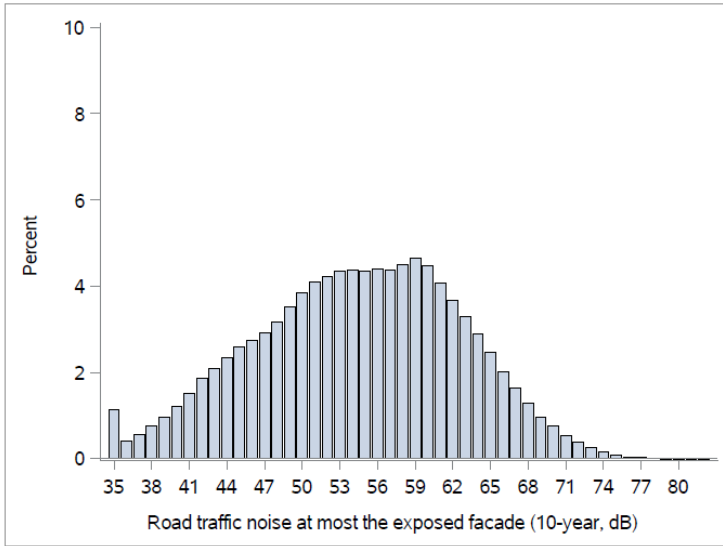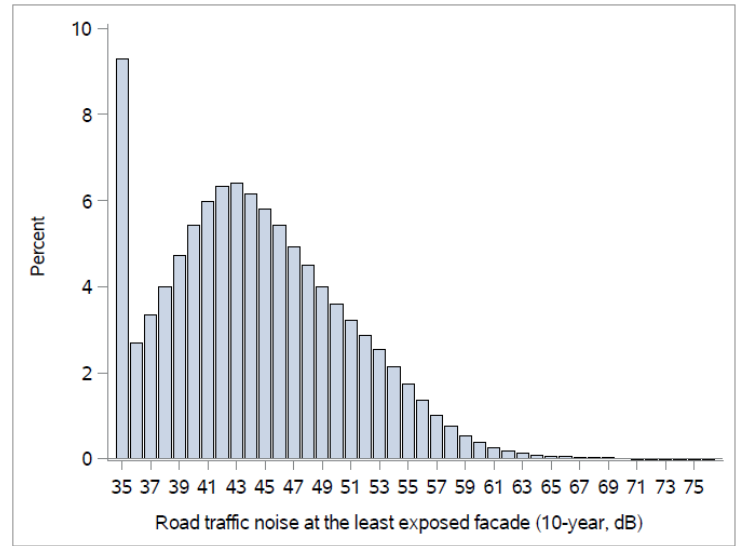

**Supplementary figure 3.** Distribution of road traffic noise at the most and least exposure façade (10-year mean at baseline, i.e. time-fixed) for the entire study population (N = 1,938,994)

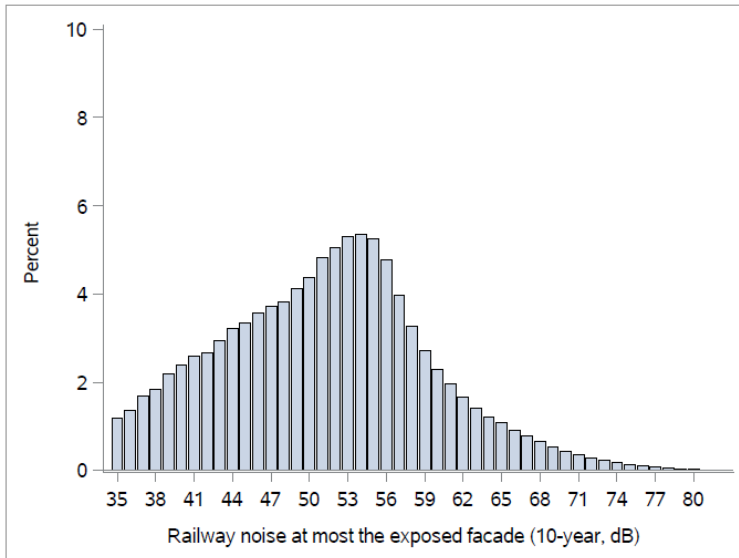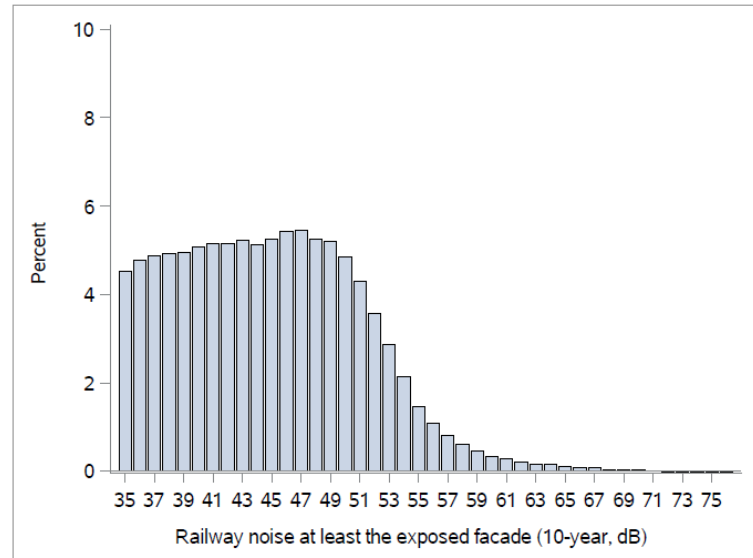

**Supplementary figure 4.** Distribution of railway noise at the most and least exposure façade (10-year mean at baseline, i.e. time-fixed) for all individuals exposed to railway noise  $\geq 35$  dB (N = 475,439 and N = 369,207 for most and least exposed façades, respectively).

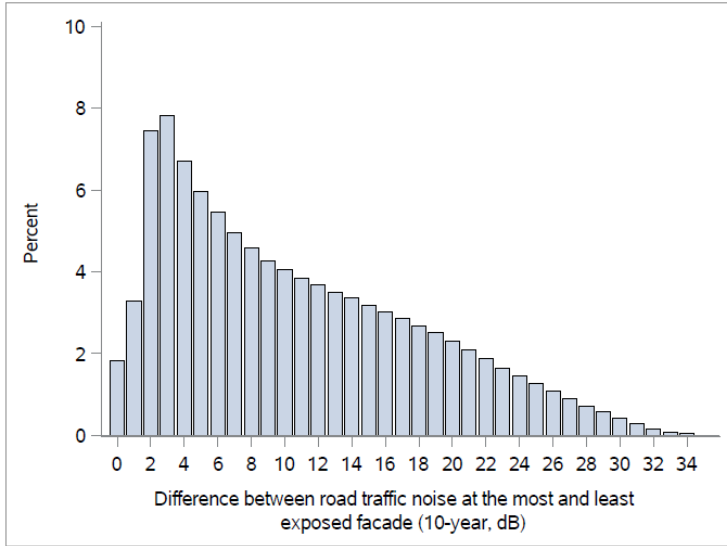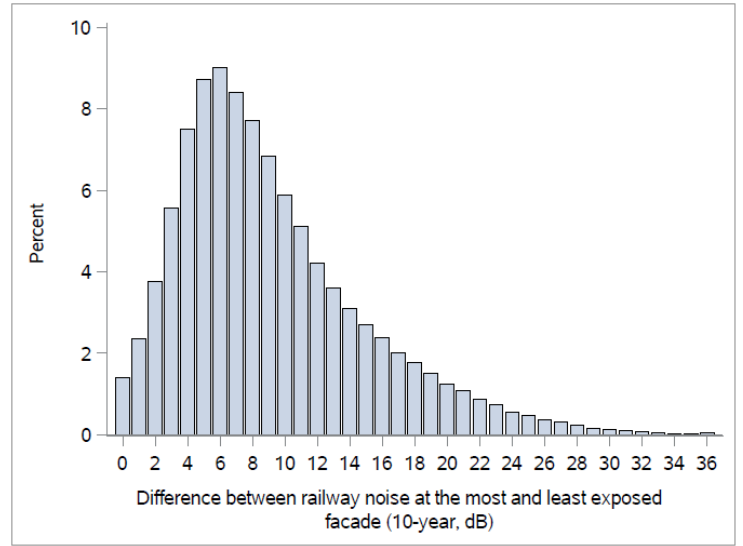

**Supplementary figure 5.** Distribution of the difference between road and traffic noise at the most ( $L_{den,max}$ ) and least exposed facade ( $L_{den,min}$ ) at the baseline address for the entire study population.



**Supplementary table 4.** Associations between categories of 10-year mean residential exposure to road traffic and railway noise at the most ( $L_{\text{nightmax}}$ ) and least ( $L_{\text{nightmin}}$ ) exposed façade and risk for all-cause dementia.

| Noise exposure (10-year)                         | Category            | N cases | Model 1<br>HR (95% CI) <sup>a,b</sup> | Model 2<br>HR (95% CI) <sup>a,c</sup> |
|--------------------------------------------------|---------------------|---------|---------------------------------------|---------------------------------------|
| <b>Road, <math>L_{\text{nightmax}}</math></b>    | <40 dB <sup>c</sup> | 18315   | 1                                     | 1                                     |
|                                                  | 40 – 45 dB          | 19682   | 1.16 (1.14 to 1.19)                   | 1.11 (1.08 to 1.13)                   |
|                                                  | 45 – 50 dB          | 23862   | 1.21 (1.19 to 1.24)                   | 1.13 (1.11 to 1.15)                   |
|                                                  | 50 – 55 dB          | 23739   | 1.24 (1.22 to 1.26)                   | 1.13 (1.11 to 1.16)                   |
|                                                  | ≥60 dB              | 17902   | 1.26 (1.23 to 1.28)                   | 1.12 (1.10 to 1.15)                   |
| <b>Road, <math>L_{\text{nightmin}}</math></b>    | <40 dB <sup>c</sup> | 68258   | 1                                     | 1                                     |
|                                                  | 40 – 45 dB          | 20953   | 1.18 (1.16 to 1.19)                   | 1.09 (1.08 to 1.11)                   |
|                                                  | 45 – 50 dB          | 10843   | 1.19 (1.16 to 1.21)                   | 1.07 (1.05 to 1.10)                   |
|                                                  | ≥50 dB              | 3446    | 1.21 (1.17 to 1.19)                   | 1.05 (1.01 to 1.09)                   |
| <b>Railway, <math>L_{\text{nightmax}}</math></b> | <40 dB <sup>c</sup> | 82706   | 1                                     | 1                                     |
|                                                  | 40 – 45 dB          | 6420    | 1.23 (1.20 to 1.26)                   | 1.15 (1.12 to 1.18)                   |
|                                                  | 45 – 50 dB          | 7692    | 1.25 (1.22 to 1.28)                   | 1.17 (1.14 to 1.20)                   |
|                                                  | 50 – 55 dB          | 4118    | 1.29 (1.25 to 1.33)                   | 1.21 (1.17 to 1.25)                   |
|                                                  | ≥55 dB              | 2564    | 1.24 (1.19 to 1.29)                   | 1.14 (1.10 to 1.19)                   |
| <b>Railway, <math>L_{\text{nightmin}}</math></b> | <40 dB <sup>c</sup> | 94772   | 1                                     | 1                                     |
|                                                  | 40 – 45 dB          | 5581    | 1.24 (1.21 to 1.28)                   | 1.15 (1.12 to 1.18)                   |
|                                                  | ≥45 dB              | 3147    | 1.28 (1.23 to 1.32)                   | 1.18 (1.14 to 1.22)                   |

<sup>a</sup> Hazard ratio (95% confidence interval).

<sup>b</sup> Adjusted for age (by design), sex and calendar year.

<sup>c</sup> Adjusted for age (by design), sex, calendar year, civil status, income, region of origin, occupational status, proportion of high-quality green space, and a number of area-level socioeconomic variables: percent population with low income, with only basic education, who are unemployed, with manual labor, who are single-parent and with a criminal record, as well as mutual road traffic and railway noise adjustment. All covariates, apart from sex and region of origin, were included in the model as time-varying variables.



**Supplementary table 5.** Associations between categories combining residential exposure to road traffic at the most and least exposed façade and risk for incident all-cause dementia. <sup>a,b</sup>

| Road traffic noise, $L_{denmin}$ | Road traffic noise, $L_{denmax}$ |                     |                     |
|----------------------------------|----------------------------------|---------------------|---------------------|
|                                  | <55 dB                           | 55-60 dB            | ≥60 dB              |
| <40 dB                           | N = 12,236                       | N = 3,029           | N = 2,871           |
|                                  | Reference                        | 1.05 (1.01 to 1.09) | 1.00 (0.96 to 1.04) |
| 40-50 dB                         | N = 28,294                       | N = 12,511          | N = 16,832          |
|                                  | 1.13 (1.10 to 1.15)              | 1.18 (1.15 to 1.21) | 1.17 (1.14 to 1.19) |
| ≥50 dB                           | N = 4,426                        | N = 9,200           | N = 14,101          |
|                                  | 1.21 (1.17 to 1.26)              | 1.19 (1.16 to 1.23) | 1.20 (1.17 to 1.23) |

<sup>a</sup> Results are given in hazard ratio (95% confidence interval).

<sup>b</sup> Model 2: adjusted for age (by design), railway noise, sex, calendar year, civil status, income, region of origin, occupational status, proportion of high-quality green space, and a number of area-level socioeconomic variables: percent population with low income, with only basic education, who are unemployed, with manual labor, who are single-parent and with a criminal record. All covariates, apart from sex and region of origin, were included in the model as time-varying variables.

**Supplementary table 6.** Associations between categories combining residential exposure to road traffic and railway noise (at the most and least exposed façade) and risk for incident all-cause dementia. <sup>a,b</sup>

|                                                 | <b>Road traffic noise, <math>L_{den, max}</math></b> |                     |                     |
|-------------------------------------------------|------------------------------------------------------|---------------------|---------------------|
| <b>Railway noise, <math>L_{den, max}</math></b> | <b>&lt; 55dB</b>                                     | <b>55-65 dB</b>     | <b>≥65 dB</b>       |
| <b>&lt;40 dB</b>                                | N = 35,238                                           | N = 32,071          | N = 8,381           |
|                                                 | Reference                                            | 1.05 (1.04 to 1.07) | 1.06 (1.03 to 1.09) |
| <b>40 – 50 dB</b>                               | N = 3,747                                            | N = 4,930           | N = 1,611           |
|                                                 | 1.09 (1.05 to 1.13)                                  | 1.18 (1.15 to 1.22) | 1.16 (1.10 to 1.22) |
| <b>≥50 dB</b>                                   | N = 5,971                                            | N = 8,857           | N = 2,694           |
|                                                 | 1.18 (1.15 to 1.22)                                  | 1.27 (1.24 to 1.30) | 1.22 (1.18 to 1.27) |
|                                                 | <b>Road traffic noise, <math>L_{den, min}</math></b> |                     |                     |
| <b>Railway noise, <math>L_{den, min}</math></b> | <b>&lt;45 dB</b>                                     | <b>45-55 dB</b>     | <b>≥55 dB</b>       |
| <b>&lt;35 dB</b>                                | N = 41,530                                           | N = 32,321          | N = 6,676           |
|                                                 | Reference                                            | 1.11 (1.10 to 1.13) | 1.11 (1.08 to 1.14) |
| <b>35 – 45 dB</b>                               | N = 4,141                                            | N = 6,277           | N = 1,396           |
|                                                 | 1.15 (1.12 to 1.19)                                  | 1.23 (1.20 to 1.26) | 1.21 (1.14 to 1.27) |
| <b>≥45 dB</b>                                   | N = 2,771                                            | N = 6,704           | N = 1,684           |
|                                                 | 1.22 (1.17 to 1.27)                                  | 1.31 (1.27 to 1.34) | 1.24 (1.18 to 1.31) |

<sup>a</sup> Results are given in hazard ratio (95% confidence interval).

<sup>b</sup> Model 2: adjusted for age (by design), sex, calendar year, civil status, income, region of origin, occupational status, proportion of high-quality green space, and a number of area-level socioeconomic variables: percent population with low income, with only basic education, who are unemployed, with manual labor, who are single-parent and with a criminal record, as well as mutual road traffic and railway noise adjustment. All covariates, apart from sex and region of origin, were included in the model as time-varying variables.

**Supplementary table 7.** Associations between categories of 10-year mean residential exposure to road traffic and railway noise at the most ( $L_{denmax}$ ) and least ( $L_{denmin}$ ) exposed façade and risk for all-cause dementia.

| Noise exposure (10-year)                | Category             | N cases | Model 1<br>HR (95% CI) <sup>a,b</sup> | Model 2<br>HR (95% CI) <sup>a,c</sup> | Model 3<br>HR (95% CI) <sup>a,d</sup> |
|-----------------------------------------|----------------------|---------|---------------------------------------|---------------------------------------|---------------------------------------|
| <b>Road, <math>L_{denmax}</math></b>    | < 45 dB <sup>c</sup> | 9718    | 1                                     | 1                                     | 1                                     |
|                                         | 45 – 50 dB           | 13500   | 1.14 (1.11 to 1.17)                   | 1.09 (1.06 to 1.12)                   | 1.08 (1.05 to 1.11)                   |
|                                         | 50 – 55 dB           | 21738   | 1.25 (1.22 to 1.28)                   | 1.16 (1.13 to 1.19)                   | 1.15 (1.12 to 1.18)                   |
|                                         | 55 – 60 dB           | 24533   | 1.29 (1.26 to 1.32)                   | 1.17 (1.14 to 1.20)                   | 1.15 (1.13 to 1.18)                   |
|                                         | 60 – 65 dB           | 21196   | 1.30 (1.27 to 1.33)                   | 1.16 (1.13 to 1.19)                   | 1.14 (1.11 to 1.17)                   |
|                                         | ≥ 65 dB              | 12815   | 1.34 (1.30 to 1.38)                   | 1.16 (1.13 to 1.19)                   | 1.08 (1.05 to 1.11)                   |
| <b>Road, <math>L_{denmin}</math></b>    | < 40 dB <sup>c</sup> | 18136   | 1                                     | 1                                     | 1                                     |
|                                         | 40 – 45 dB           | 30306   | 1.19 (1.17 to 1.22)                   | 1.12 (1.10 to 1.14)                   | 1.10 (1.08 to 1.13)                   |
|                                         | 45 – 50 dB           | 27261   | 1.31 (1.28 to 1.33)                   | 1.18 (1.16 to 1.20)                   | 1.16 (1.13 to 1.18)                   |
|                                         | 50 – 55 dB           | 18005   | 1.39 (1.36 to 1.41)                   | 1.21 (1.19 to 1.24)                   | 1.18 (1.16 to 1.21)                   |
|                                         | ≥ 55 dB              | 9792    | 1.39 (1.35 to 1.42)                   | 1.18 (1.15 to 1.21)                   | 1.14 (1.11 to 1.17)                   |
| <b>Railway, <math>L_{denmax}</math></b> | < 40 dB <sup>c</sup> | 75690   | 1                                     | 1                                     | 1                                     |
|                                         | 40 – 45 dB           | 4441    | 1.13 (1.10 to 1.17)                   | 1.09 (1.06 to 1.12)                   | 1.09 (1.05 to 1.12)                   |
|                                         | 45 – 50 dB           | 5844    | 1.19 (1.16 to 1.22)                   | 1.11 (1.08 to 1.14)                   | 1.10 (1.07 to 1.13)                   |
|                                         | 50 – 55 dB           | 8040    | 1.28 (1.25 to 1.31)                   | 1.19 (1.16 to 1.22)                   | 1.16 (1.13 to 1.19)                   |
|                                         | 55 – 60 dB           | 5577    | 1.27 (1.24 to 1.31)                   | 1.19 (1.16 to 1.23)                   | 1.16 (1.13 to 1.19)                   |
|                                         | ≥ 60 dB              | 3908    | 1.26 (1.22 to 1.30)                   | 1.16 (1.12 to 1.20)                   | 1.13 (1.09 to 1.16)                   |
| <b>Railway, <math>L_{denmin}</math></b> | < 40 dB <sup>c</sup> | 86286   | 1                                     | 1                                     | 1                                     |
|                                         | 40 – 45 dB           | 6049    | 1.22 (1.18 to 1.25)                   | 1.12 (1.09 to 1.15)                   | 1.10 (1.07 to 1.13)                   |
|                                         | 45 – 50 dB           | 6302    | 1.29 (1.25 to 1.32)                   | 1.17 (1.14 to 1.20)                   | 1.14 (1.11 to 1.17)                   |
|                                         | ≥ 50 dB              | 4863    | 1.27 (1.24 to 1.31)                   | 1.16 (1.12 to 1.19)                   | 1.13 (1.10 to 1.16)                   |

<sup>a</sup> Hazard ratio (95% confidence interval).

<sup>b</sup> Adjusted for age (by design), sex and calendar year.

<sup>c</sup> Adjusted for age (by design), sex, calendar year, civil status, income, region of origin, occupational status, proportion of high-quality green space, and a number of area-level socioeconomic variables: percent population with low income, with only basic education, who are unemployed, with manual labor, who are single-parent and with a criminal record, as well as mutual road traffic and railway noise adjustment. All covariates, apart from sex and region of origin, were included in the model as time-varying variables.

<sup>d</sup> Model 2 plus adjustment for time-weighted 10-y mean  $PM_{2.5}$ .

**Supplementary table 8.** Sensitivity analysis for the associations between categories of 10-year mean residential exposure to road traffic and railway noise at the most ( $L_{denmax}$ ) and least ( $L_{denmin}$ ) exposed façade and risk for all-cause dementia.

| Noise exposure (10-year)                | Category                                | Model 2<br>HR (95% CI) <sup>a,b,c</sup> | Model 2 +<br>Mutual adjustment for<br>$L_{denmax}$ and $L_{denmin}$<br>HR (95% CI) <sup>a,b,c</sup> | Model 2 +<br>Adjustment for 10-y<br>mean $PM_{2.5}$ and $NO_2$ .<br>HR (95% CI) <sup>a,b,c</sup> | Model 2 +<br>Adjustment for<br>education<br>HR (95% CI) <sup>a,b,d</sup> | Model 2<br>Cases with a primary<br>dementia diagnosis<br>HR (95% CI) <sup>a,b,e</sup> |
|-----------------------------------------|-----------------------------------------|-----------------------------------------|-----------------------------------------------------------------------------------------------------|--------------------------------------------------------------------------------------------------|--------------------------------------------------------------------------|---------------------------------------------------------------------------------------|
| <b>Road, <math>L_{denmax}</math></b>    | <45 dB <sup>c</sup>                     | 1                                       | 1                                                                                                   | 1                                                                                                | 1                                                                        | 1                                                                                     |
|                                         | 45 – 50 dB                              | 1.09 (1.06 to 1.12)                     | 1.04 (1.01 to 1.07)                                                                                 | 1.08 (1.05 to 1.11)                                                                              | 1.09 (1.06 to 1.12)                                                      | 1.07 (1.02 to 1.11)                                                                   |
|                                         | 50 – 55 dB                              | 1.16 (1.13 to 1.19)                     | 1.08 (1.06 to 1.11)                                                                                 | 1.15 (1.12 to 1.17)                                                                              | 1.16 (1.13 to 1.19)                                                      | 1.16 (1.12 to 1.21)                                                                   |
|                                         | 55 – 60 dB                              | 1.17 (1.14 to 1.20)                     | 1.09 (1.06 to 1.12)                                                                                 | 1.14 (1.12 to 1.17)                                                                              | 1.17 (1.14 to 1.20)                                                      | 1.15 (1.11 to 1.19)                                                                   |
|                                         | 60 – 65 dB                              | 1.16 (1.13 to 1.19)                     | 1.08 (1.05 to 1.11)                                                                                 | 1.12 (1.10 to 1.15)                                                                              | 1.16 (1.13 to 1.19)                                                      | 1.14 (1.10 to 1.19)                                                                   |
|                                         | ≥65 dB                                  | 1.16 (1.13 to 1.19)                     | 1.08 (1.05 to 1.11)                                                                                 | 1.04 (1.01 to 1.08)                                                                              | 1.14 (1.11 to 1.18)                                                      | 1.17 (1.12 to 1.22)                                                                   |
| <b>Road, <math>L_{denmin}</math></b>    | <40 dB <sup>c</sup>                     | 1                                       | 1                                                                                                   | 1                                                                                                | 1                                                                        | 1                                                                                     |
|                                         | 40 – 45 dB                              | 1.12 (1.10 to 1.14)                     | 1.10 (1.08 to 1.12)                                                                                 | 1.10 (1.08 to 1.12)                                                                              | 1.12 (1.09 to 1.14)                                                      | 1.13 (1.09 to 1.16)                                                                   |
|                                         | 45 – 50 dB                              | 1.18 (1.16 to 1.20)                     | 1.14 (1.12 to 1.17)                                                                                 | 1.15 (1.13 to 1.18)                                                                              | 1.17 (1.15 to 1.20)                                                      | 1.22 (1.18 to 1.26)                                                                   |
|                                         | 50 – 55 dB                              | 1.21 (1.19 to 1.24)                     | 1.16 (1.14 to 1.19)                                                                                 | 1.18 (1.15 to 1.20)                                                                              | 1.20 (1.17 to 1.23)                                                      | 1.33 (1.28 to 1.37)                                                                   |
|                                         | ≥55 dB                                  | 1.18 (1.15 to 1.21)                     | 1.13 (1.10 to 1.17)                                                                                 | 1.13 (1.10 to 1.16)                                                                              | 1.16 (1.13 to 1.19)                                                      | 1.30 (1.25 to 1.35)                                                                   |
|                                         | <b>Railway, <math>L_{denmax}</math></b> | <40 dB <sup>c</sup>                     | 1                                                                                                   | 1                                                                                                | 1                                                                        | 1                                                                                     |
| 40 – 45 dB                              |                                         | 1.09 (1.06 to 1.12)                     | 1.08 (1.05 to 1.12)                                                                                 | 1.08 (1.05 to 1.12)                                                                              | 1.10 (1.06 to 1.14)                                                      | 1.01 (0.96 to 1.06)                                                                   |
| 45 – 50 dB                              |                                         | 1.11 (1.08 to 1.14)                     | 1.09 (1.06 to 1.13)                                                                                 | 1.10 (1.07 to 1.13)                                                                              | 1.11 (1.08 to 1.15)                                                      | 1.07 (1.03 to 1.11)                                                                   |
| 50 – 55 dB                              |                                         | 1.19 (1.16 to 1.22)                     | 1.15 (1.11 to 1.19)                                                                                 | 1.16 (1.13 to 1.19)                                                                              | 1.19 (1.16 to 1.22)                                                      | 1.20 (1.16 to 1.25)                                                                   |
| 55 – 60 dB                              |                                         | 1.19 (1.16 to 1.23)                     | 1.15 (1.11 to 1.19)                                                                                 | 1.16 (1.13 to 1.19)                                                                              | 1.18 (1.14 to 1.22)                                                      | 1.18 (1.13 to 1.23)                                                                   |
| ≥60 dB                                  |                                         | 1.16 (1.12 to 1.20)                     | 1.11 (1.07 to 1.16)                                                                                 | 1.13 (1.09 to 1.16)                                                                              | 1.16 (1.12 to 1.21)                                                      | 1.15 (1.10 to 1.21)                                                                   |
| <b>Railway, <math>L_{denmin}</math></b> | <40 dB <sup>c</sup>                     | 1                                       | 1                                                                                                   | 1                                                                                                | 1                                                                        | 1                                                                                     |
|                                         | 40 – 45 dB                              | 1.12 (1.09 to 1.15)                     | 1.01 (0.98 to 1.05)                                                                                 | 1.10 (1.07 to 1.13)                                                                              | 1.13 (1.10 to 1.16)                                                      | 1.10 (1.06 to 1.15)                                                                   |
|                                         | 45 – 50 dB                              | 1.17 (1.14 to 1.20)                     | 1.04 (1.00 to 1.08)                                                                                 | 1.14 (1.11 to 1.17)                                                                              | 1.16 (1.12 to 1.19)                                                      | 1.18 (1.14 to 1.23)                                                                   |
|                                         | ≥50 dB                                  | 1.16 (1.12 to 1.19)                     | 1.03 (0.99 to 1.08)                                                                                 | 1.13 (1.10 to 1.17)                                                                              | 1.15 (1.12 to 1.19)                                                      | 1.21 (1.16 to 1.27)                                                                   |

<sup>a</sup> Hazard ratio (95% confidence interval).

<sup>b</sup> Model 2: adjusted for age (by design), sex, calendar year, civil status, income, region of origin, occupational status, proportion of high-quality green space, and a number of area-level socioeconomic variables: percent population with low income, with only basic education, who are unemployed, with manual labor, who are single-parent and with a criminal record, as well as mutual road traffic and railway noise adjustment. All covariates, apart from sex and region of origin, were included in the model as time-varying variables.

<sup>c</sup> N = 103,500 cases.

<sup>d</sup> N = 85,684 cases.

<sup>e</sup> N = 42,413 cases.

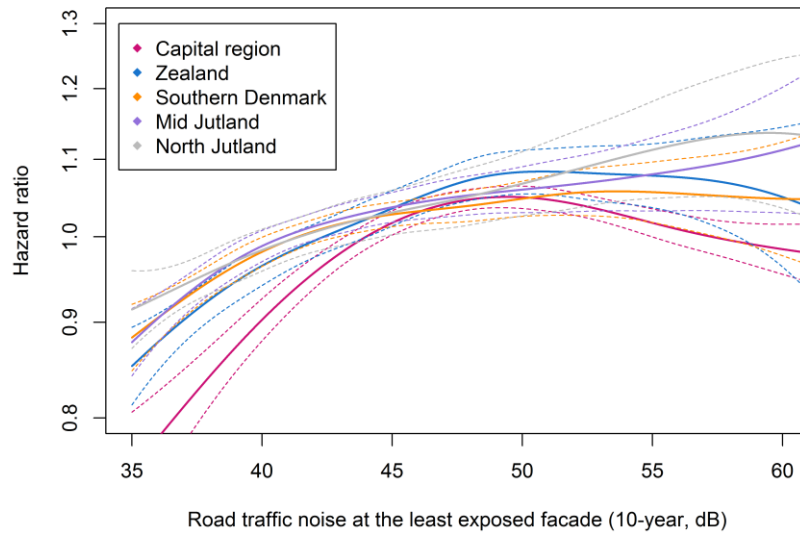

**Supplementary figure 6.** Associations between 10-year mean exposure to road traffic noise at the least exposed façade and risk for incident all-cause dementia according to the five regions in Denmark. The figure shows hazard ratios and corresponding 95% confidence intervals.
